# Supplementary material for: The Progenetix oncogenomic resource in 2021
Source: Oxford University Press journal article supplement (doi:10.1093/database/baab043), 2021-01-01

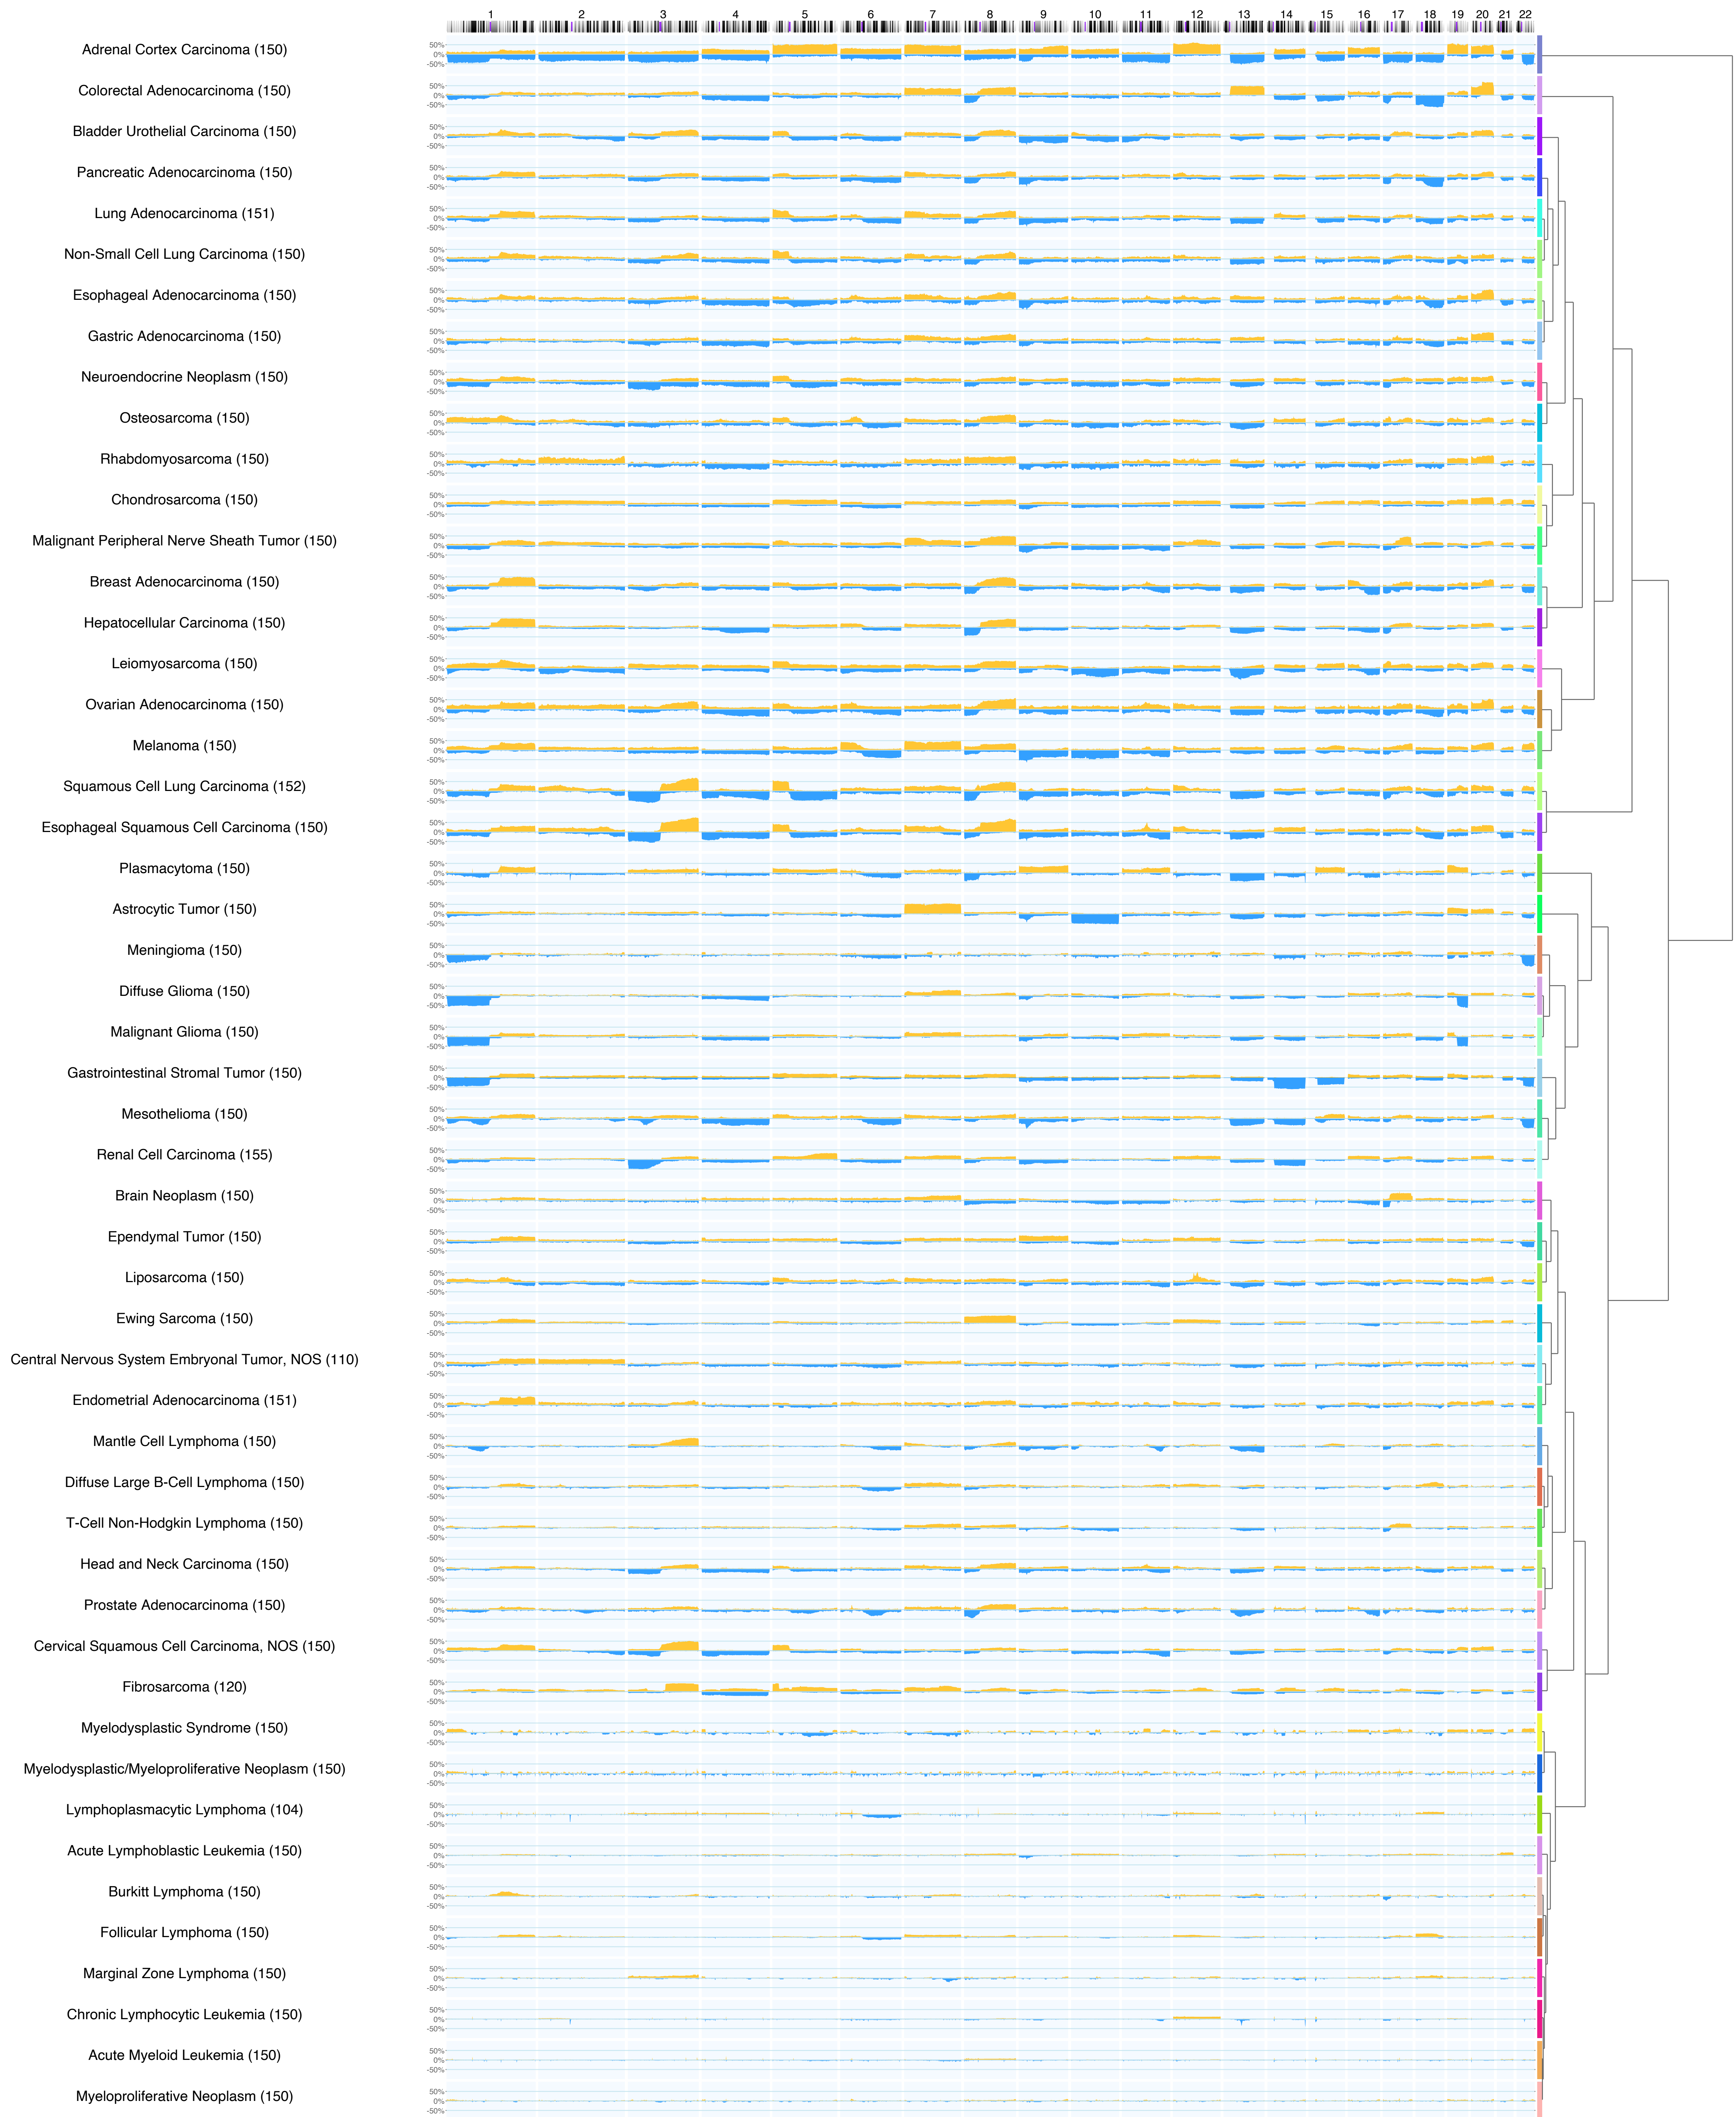

Supplement: baab043_supp.zip [file baab043_supp.zip]
